# Supplementary material for: Single-cell analysis of a mutant library generated using CRISPR-guided deaminase in human melanoma cells
Source: PubMed Central journal article supplement (PMC7118117; doi:10.1038/s42003-020-0888-2), 2020-04-02
Supplement: 42003_2020_888_MOESM12_ESM.pdf [file 42003_2020_888_MOESM12_ESM.pdf]

**Editorial Note:** *This manuscript has been previously reviewed at another Nature Research journal. The manuscript was considered suitable for publication without further review at Communications Biology*
